# Supplementary material
Source: PubMed Central journal article supplement (PMC3993569)
Supplement: MCB.01441-13_zmb999100354so1.pdf [file MCB.01441-13_zmb999100354so1.pdf]

1 **Loss of Von Hippel-Lindau (VHL) increases systemic cholesterol level through**  
2 **targeting Hif-2 $\alpha$  and regulation of bile acid homeostasis**

3

4 Sadeesh K. Ramakrishnan<sup>1</sup>, Matthew Taylor<sup>1</sup>, Aijuan Qu<sup>4</sup>, Sung-Hoon Ahn<sup>4</sup>,  
5 Madathilparambil V Suresh<sup>3</sup>, Krishnan Raghavendran<sup>3</sup>, Frank J. Gonzalez<sup>4</sup>, and  
6 Yatrik M. Shah<sup>1,2</sup>

7 **Table S1 List of qPCR primers and their sequence**

| Name    | Forward                | Reverse              |
|---------|------------------------|----------------------|
| Cyp51   | TTGATCTCTCGATGGGCTCT   | CTGGATGGAGGTTTTACCCA |
| Hmgs1   | TTCAAAGGAAGTGACCCAGG   | GGTCTGATCCCCTTTGGTG  |
| Scd1    | CAGCCGAGCCTTGTAAGTTC   | GCTCTACACCTGCCTCTTCG |
| Scd2    | TGCCTTGTATGTTCTGTGGC   | TCCTGCAAGCTCTACACCTG |
| Hmgcr   | CACAATAACTTCCCAGGGGT   | GGCCTCCATTTAGATCCG   |
| Srebp2  | CCCTATTCCATTGACTCTGAGC | GAGTCCGGTTCATCCTTGAC |
| ABCG5   | TTCACAAACACCTCCCCTTC   | GTGCATCTTAGGCAGCTCAG |
| ABCG8   | TCCGAGGAGAACAAGCTGTC   | CACTGGTCATGGCTGAGAAA |
| NPC1L1  | GCCTGAGGTGGTGTCAAAGT   | GGACCAGGATCTGGCTCTG  |
| Cyp7a1  | GCAGAGCCTCCTTGATGATG   | GAAGCAATGAAAGCAGCCTC |
| Cyp7b1  | TTATCAAGGGTGGTTCACGA   | TCCTAGGCCTTCTCTTTGCC |
| Cyp8b1  | GATAGGGGAAGAGAGCCACC   | TCCTCAGGGTGGTACAGGAG |
| Cyp27a1 | GGGCACTAGCCAGATTCACA   | CTATGTGCTGCACTTGCCC  |
| Baat    | CAGAAAGGATGCCAACACCT   | TGACCTGCCTTCTCGACTG  |
| Bsep    | AAGGACAGCCACACCAACTC   | CCAGAACATGACAAACGGAA |
| Ntcp    | TCCGTCGTAGATTCCTTTGC   | AGGGGGACATGAACCTCAG  |

|                  |                        |                         |
|------------------|------------------------|-------------------------|
| Shp              | CGATCCTCTTCAACCCAGATG  | AGGGCTCCAAGACTTCACACA   |
| FGF15            | GAGGACCAAAACGAACGAAATT | ACGTCCTTGATGGCAATCG     |
| Amacr            | TCATCTCTGGCCAATCTGCT   | TAGGTGCCATAGAACCCAG     |
| Hsd3b7           | CGAACAATATGTTCCCCCAG   | CGCCCTGGGACTTACTACAG    |
| Cyp3a11          | GGGGGACAGCAAAGCTCTAT   | TTCTGTCTTCACAAACCGGC    |
| Cyp39a1          | ACAGATTCCAGAATGCACCA   | GCATATCTTCTGTGTTTGGA    |
| Rev-erb $\alpha$ | CGTTCGCATCAATCGCAACC   | GATGTGGAGTAGGTGAGGTC    |
| Rev-erb $\beta$  | ACGGATTCCCAGGAACATGG   | CCTCCAGTGTTGCACAGGTA    |
| E4BP4            | CGGAGCTTGAATCGCGCCCC   | GGGTTATCGTGTTCTGCTCCCTG |
| Bmal1            | GCAGTGCCACTGACTACCAAGA | TCCTGGACATTGCATTGCAT    |
| Per-1            | CTTTAGATCGGCAGTGGTGTC  | AGATCTTGGCAGGCTTCGT     |
| $\beta$ -actin   | TATTGGCAACGAGCGGTTCC   | GGCATAGAGGTCTTTACGGATGT |
